# Supplementary material
Source: publisher figshare collection journal article supplement (https://tandf.figshare.com/ndownloader/files/21902496)
Supplement: Supplementary file 1 [file 21902496]

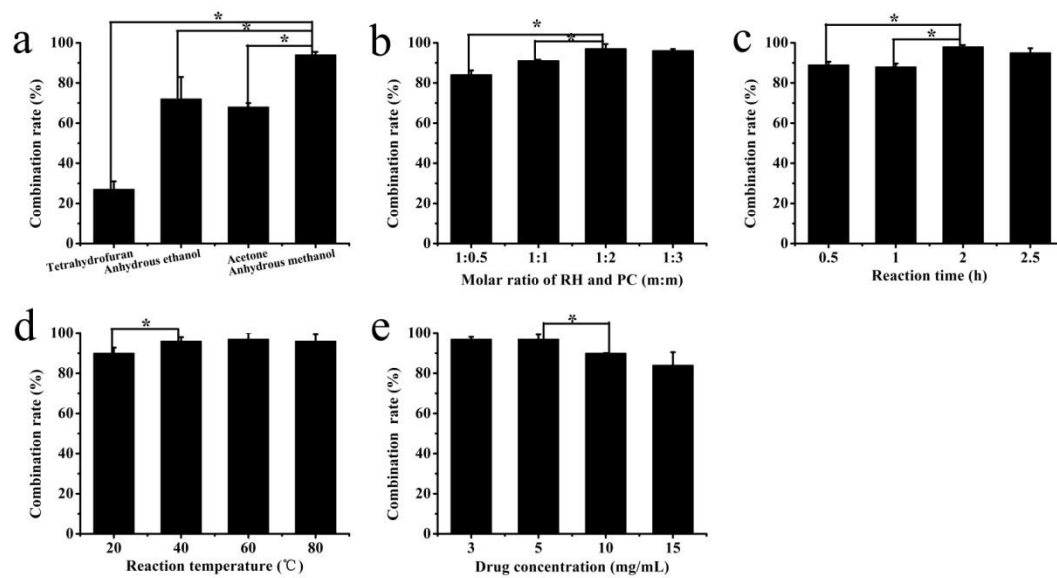

**Figure S1** Combination rate of RHPC at different **a** types of solvent **b** RH-to-PC molar ratios, **c** reaction time, **d** reaction temperature, **e** RH concentration.

Data are presented as mean  $\pm$  SD,  $n = 3$  (\* $p < 0.05$ )

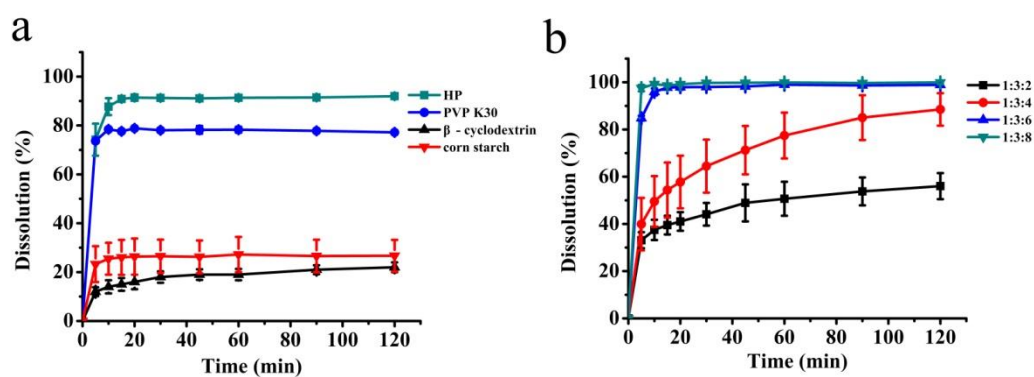

**Figure S2 Dissolution of RHPC-MD in pH 1.2 with different a types of matrix**

**b** RH-PC-HP mass ratios. Data are presented as mean  $\pm$  SD,  $n = 3$

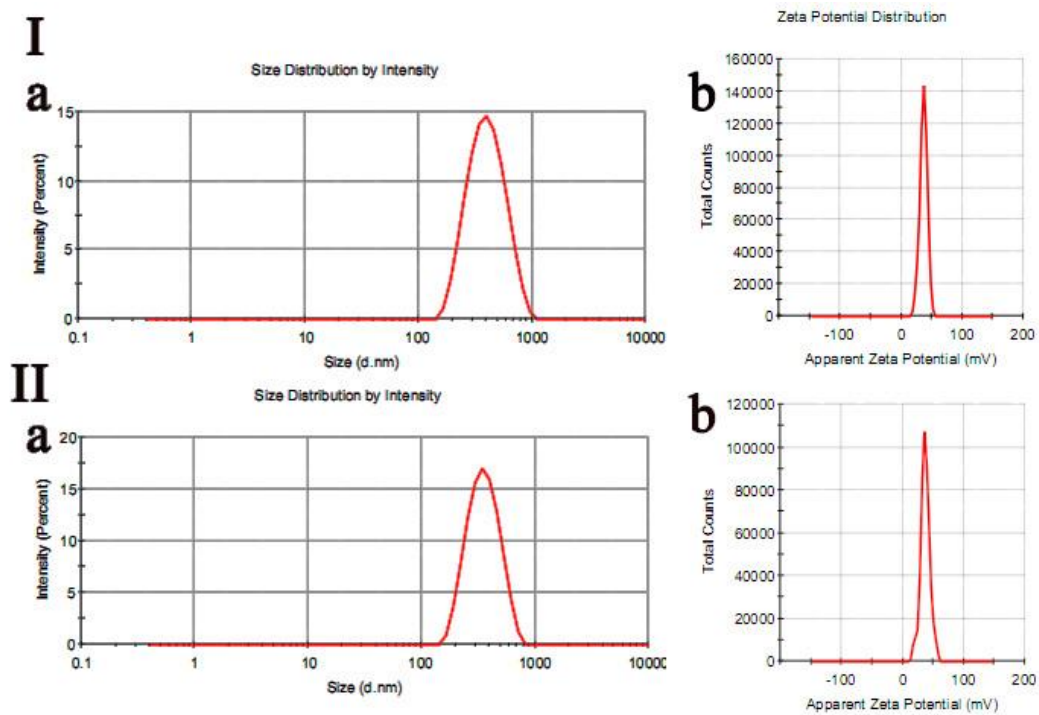

**Figure S3 I a** Partical size distribution, and **b** Zeta potential profiles of the RHPC.

**II a** Partical size distribution, and **b** Zeta potential profiles of the RHPC-MD
